# Supplementary material for: Single-photon ionization induced C–C or C–N bond formation in pyrrole clusters
Source: Royal Society of Chemistry journal article supplement (doi:10.1039/d3cp00028a), 2023-01-01
Supplement: d3cp00028a1.pdf [file d3cp00028a1.pdf]

Electronic supplementary information (ESI)

**Single-photon ionization induced C-C or C-N bonds  
formation in pyrrole clusters**

Chengcheng Wei,<sup>a</sup> Xujian Chen,<sup>a</sup> Yi Wang,<sup>a</sup> Yujian Li,<sup>a</sup> Jiao Gao,<sup>b</sup> Min Xie,<sup>\*a</sup> Yongjun Hu<sup>\*a</sup>

**AFFILIATIONS**

<sup>a</sup> MOE Key Laboratory of Laser Life Science & Guangdong Provincial Key Laboratory of Laser Life Science, Guangzhou Key Laboratory of Spectral Analysis and Functional Probes, College of Biophotonics, South China Normal University, Guangzhou 510631, China

<sup>b</sup> State Key Laboratory of Molecular Reaction Dynamics, Dalian Institute of Chemical Physics, Chinese Academy of Sciences, Dalian 116023, China

**AUTHOR INFORMATION**

**\*Corresponding Author**

E-mail: xiemin@m.scnu.edu.cn (M.X.); yjhu@scnu.edu.cn (Y.J.H.)

Telephone: (+86-20)8521-1920 EXT 8713. Fax: (+86-20) 8521-6052.

## Table of Contents

**Figure S1.** Comparison of the (a) experimental and (b) calculated IR spectra of  $(\text{py})_2$  in the C-H and N-H stretch range.

**Figure S2.** Comparison of the (a) experimental and (b-c) calculated IR spectra of  $(\text{py})_3$  in the C-H and N-H stretch range.

**Figure S3.** Geometric of eighteen stable **cc** type structures of  $(\text{py})_2^+$  predicted with B3LYP-D3(BJ)/6-311++G(d,p) level.

**Figure S4.** Geometric of eleven stable **cn** type structures of  $(\text{py})_2^+$  predicted with B3LYP-D3(BJ)/6-311++G(d,p) level.

**Figure S5.** Geometric of two stable **pp** type structures of  $(\text{py})_2^+$  predicted with B3LYP-D3(BJ)/6-311++G(d,p) level.

**Figure S6.** Geometric of five stable **n $\pi$**  type structures of  $(\text{py})_2^+$  predicted with B3LYP-D3(BJ)/6-311++G(d,p) level.

**Figure S7.** The left panel shows the mass spectra of  $(\text{py})_2^+$  and the right panel compares the IR spectra of  $(\text{py})_2^+$ ,  $\text{H}^+(\text{py})_2$  and their fragments.

**Figure S8.** The calculated RRKM isomerization rate constants of  $R_1$  and  $R_2$  as a function of the photon energy.

**Figure S9.** The left panel shows the mass spectra of  $(\text{py})_3^+$  and the right panel compares the IR spectra of  $(\text{py})_3^+$ ,  $\text{H}^+(\text{py})_3$  and their fragments.

**Table S1.** Assignments of the bands in the observed IR spectra of  $(\text{py})_2^+$ .

**Table S2.** Assignments of the bands in the observed IR spectra of  $(\text{py})_3^+$ .

**Table S3.** The frequency and intensity of anharmonic spectra of the three isomers for  $(\text{py})_2^+$ .

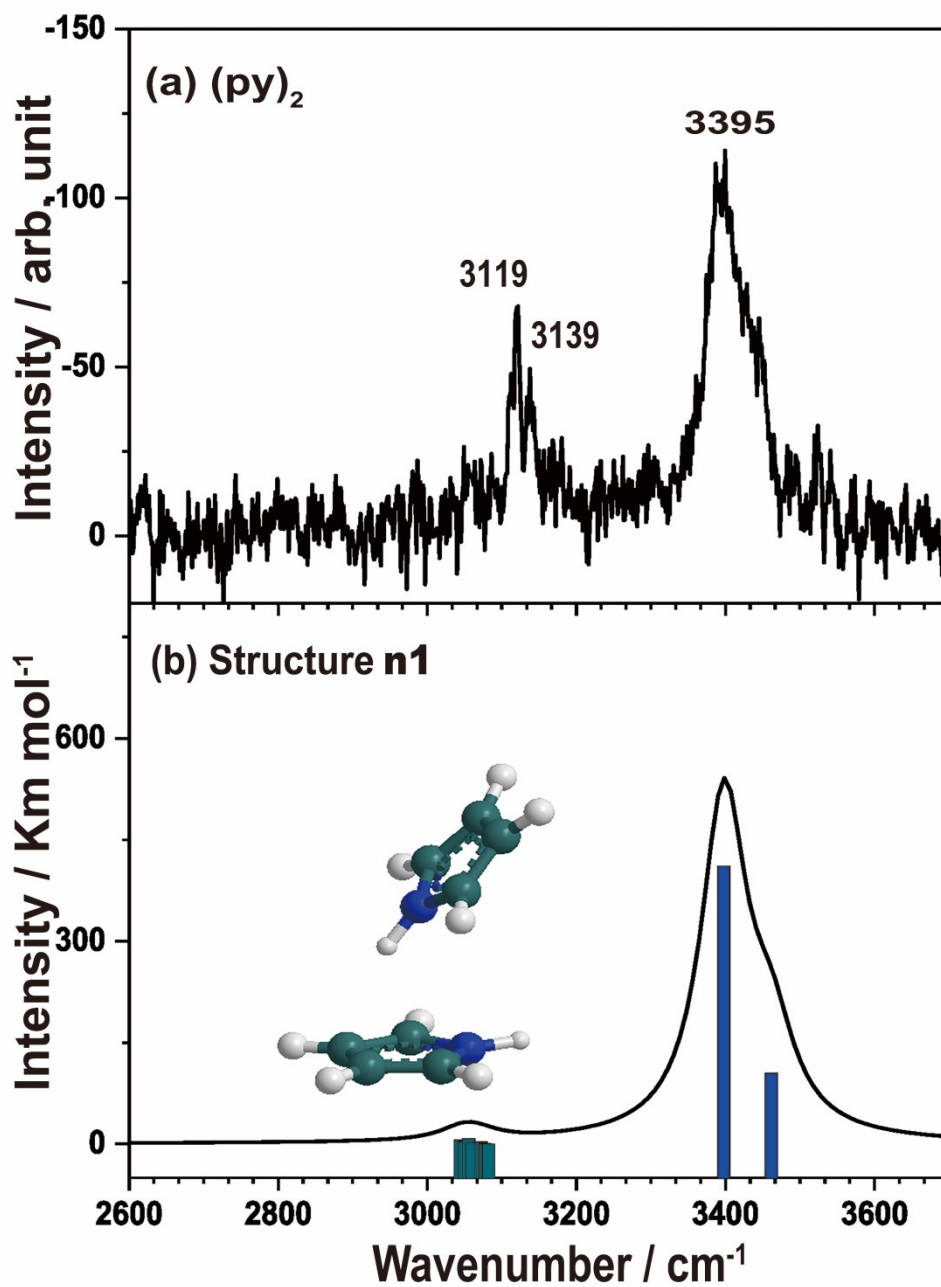

**Figure S1.** (a) Observed and (b) calculated IR spectra of (py)<sub>2</sub> in the C-H and N-H stretch range. Frequencies of **n1** were scaled by a factor of 0.943 at B3LYP-D3(BJ)/6-311++G(d,p) level, and the convoluted spectra were obtained by a Lorentzian linewidth function with a width of 20 cm<sup>-1</sup>.

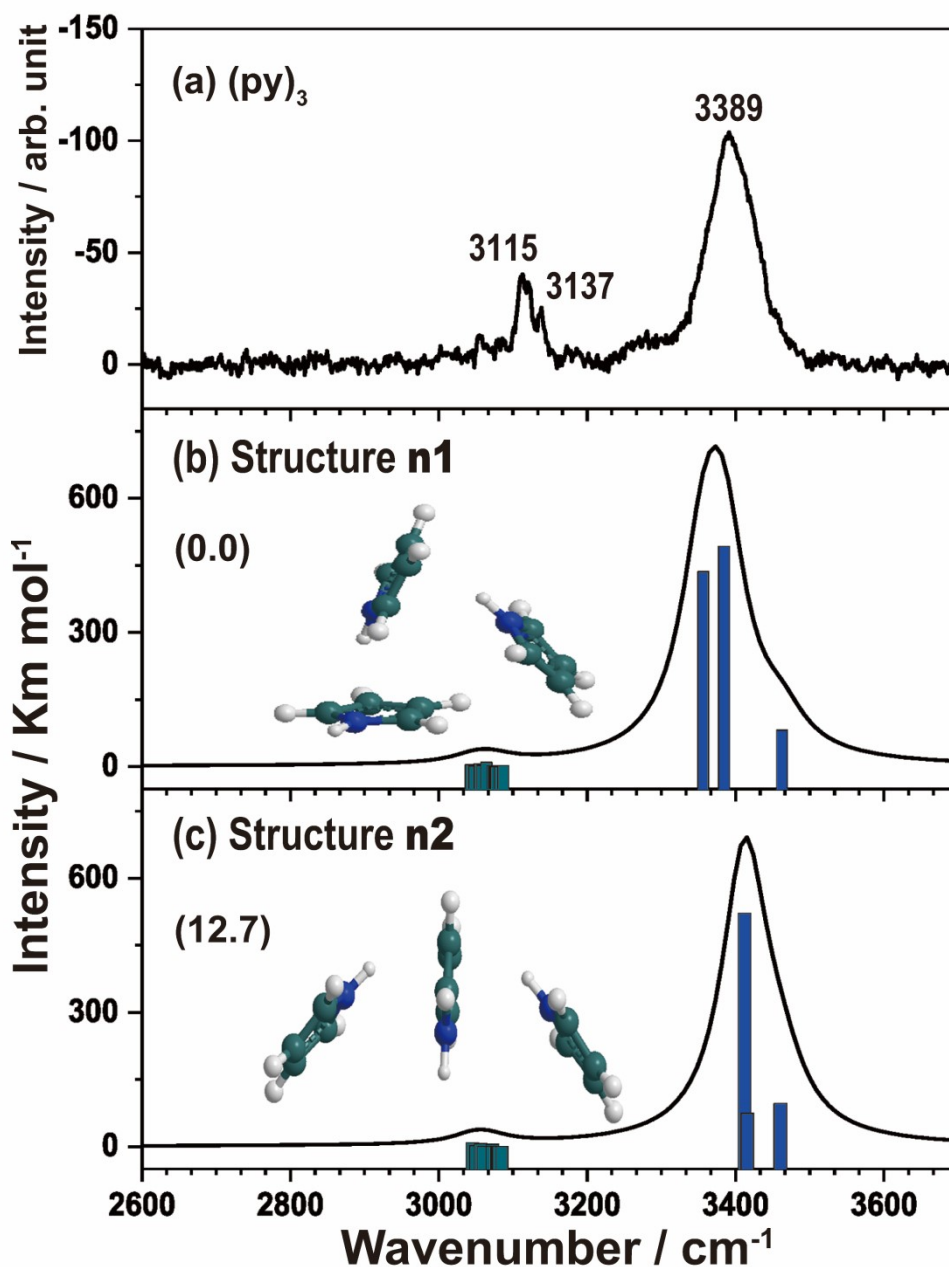

**Figure S2.** (a) Observed and (b-c) calculated IR spectra of  $(\text{py})_3$ . Frequencies of the two structures were scaled by a factor of 0.943 at B3LYP-D3(BJ)/6-311++G(d,p) level, and the convoluted spectra were obtained by a Lorentzian linewidth function with a width of  $20 \text{ cm}^{-1}$ . The predicted structures and relative energy at the zero point vibrational level (the number in parentheses in  $\text{kJ mol}^{-1}$ ) of the cluster are also shown.

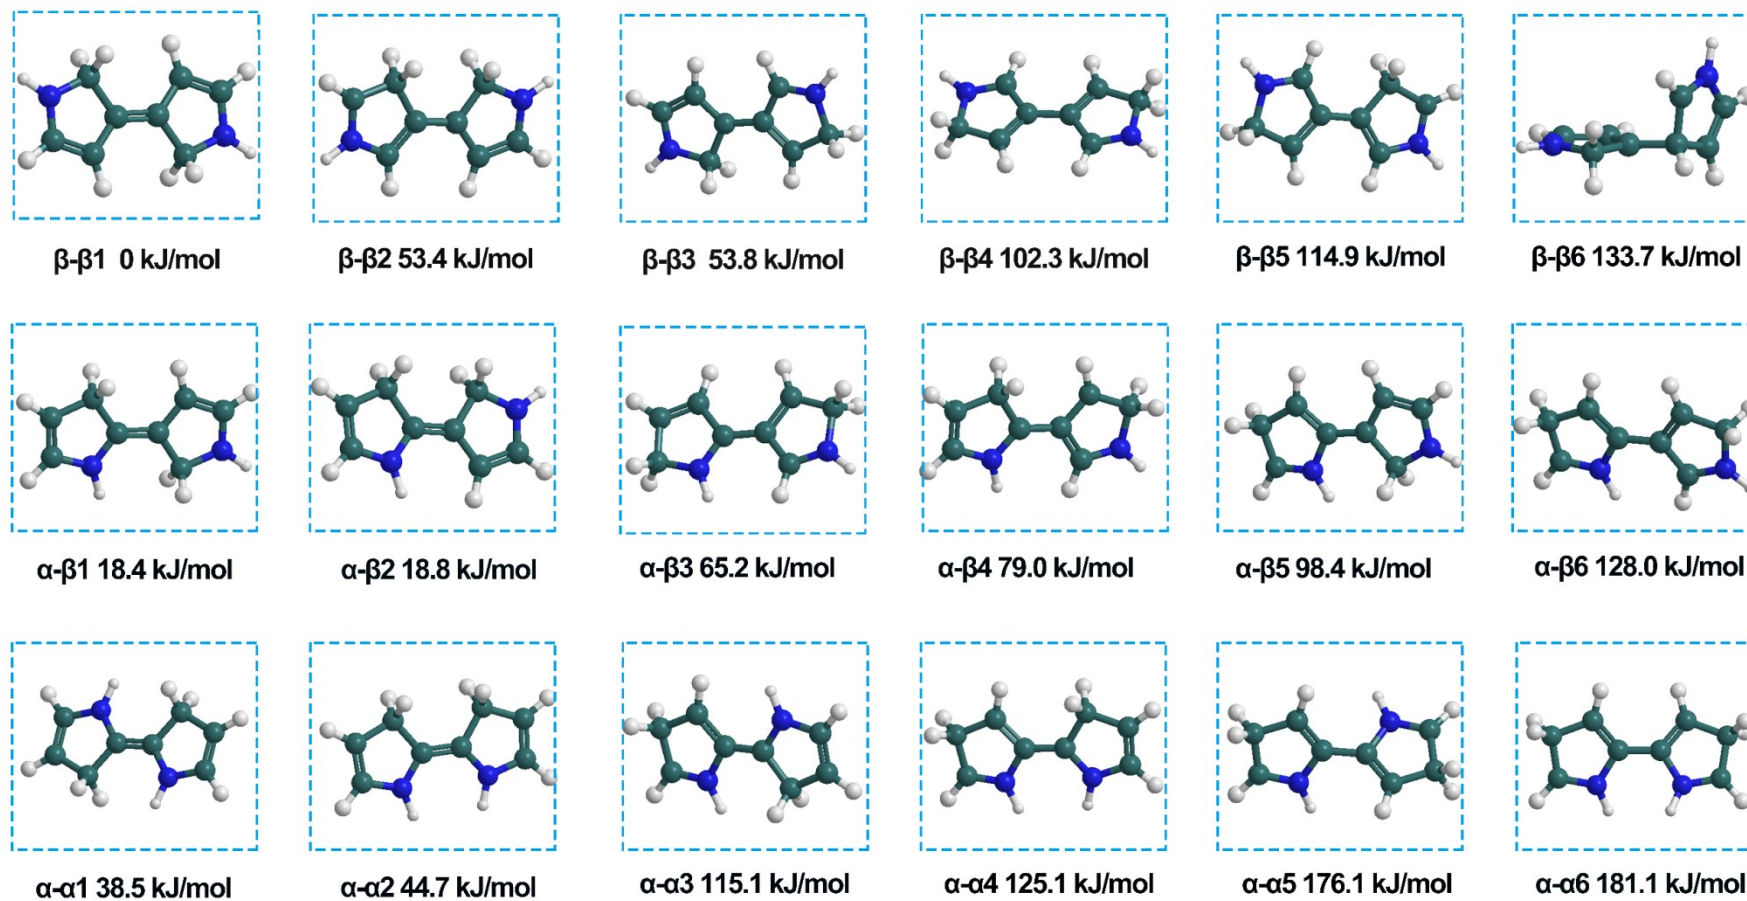

Figure S3. Geometric of eighteen stable cc type structures of  $(py)_2^+$  predicted with B3LYP-D3(BJ)/6-311++G(d,p) level.

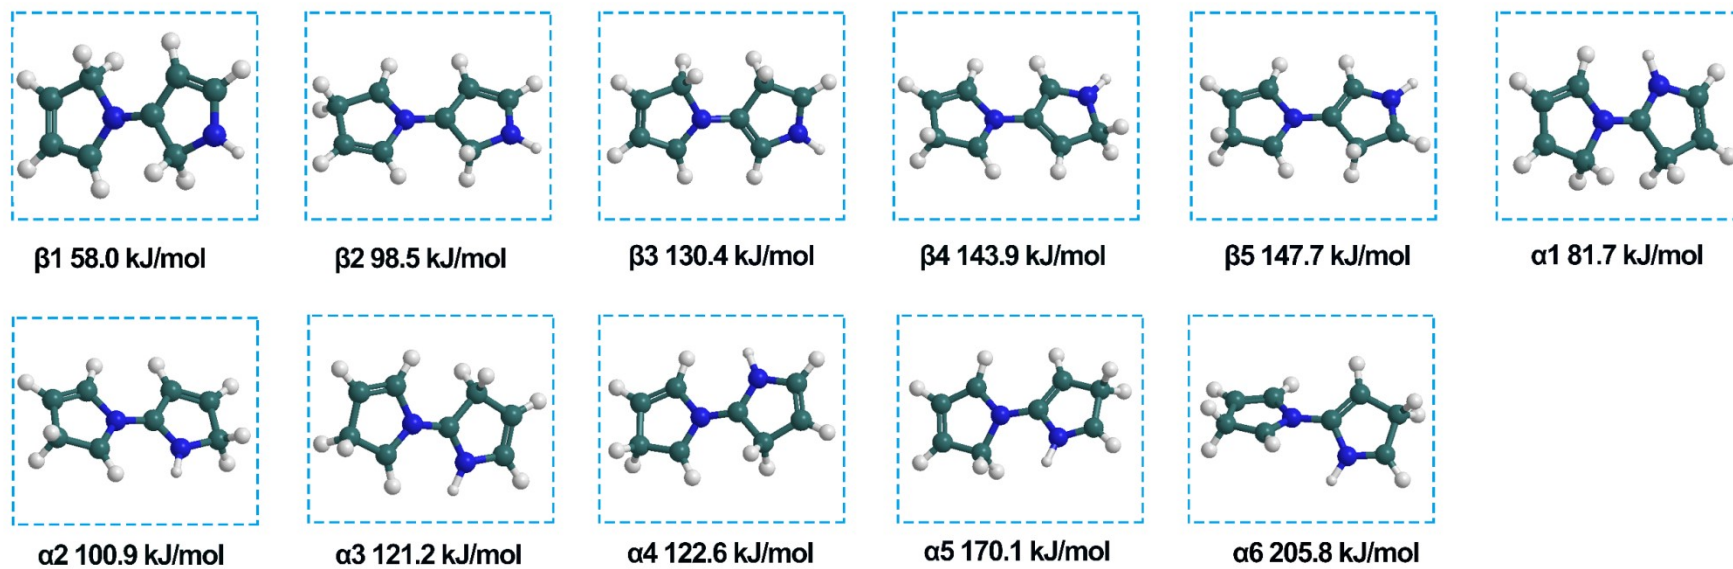

**Figure S4.** Geometric of eleven stable **cn** type structures of  $(py)_2^+$  predicted with B3LYP-D3(BJ)/6-311++G(d,p) level.

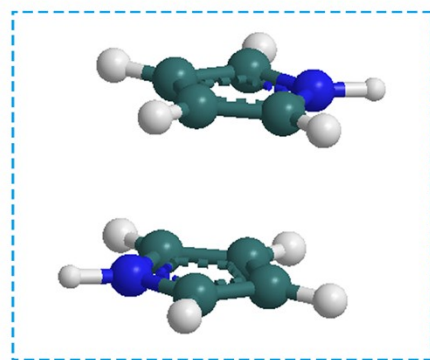

pp1 63.9 kJ/mol

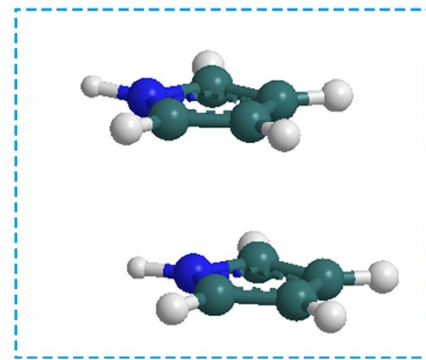

pp2 82.8 kJ/mol

Figure S5. Geometric of two stable **pp** type structures of  $(py)_2^+$  predicted with B3LYP-D3(BJ)/6-311++G(d,p) level.

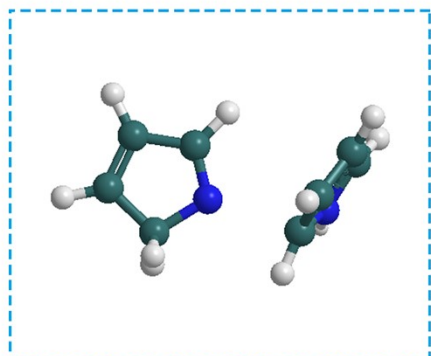

$n\pi 1$  149.3 kJ/mol

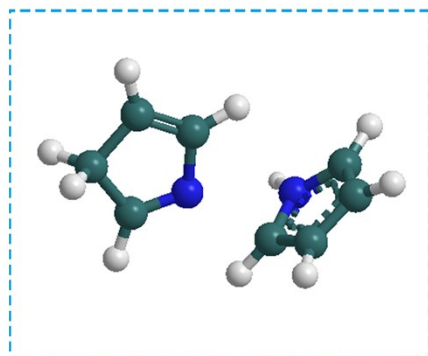

$n\pi 2$  156.9 kJ/mol

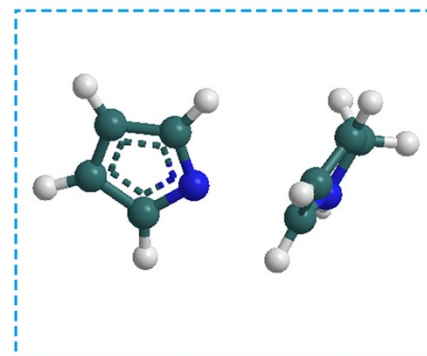

$n\pi 3$  163.0 kJ/mol

**Figure S6.** Geometric of five stable  $n\pi$  type structures of  $(py)_2^+$  predicted with B3LYP-D3(BJ)/6-311++G(d,p) level.



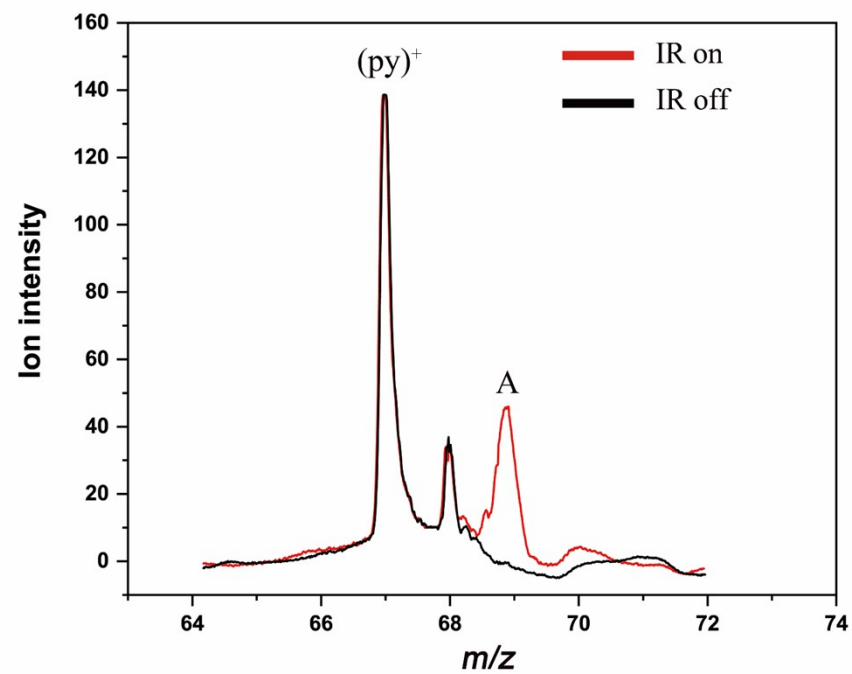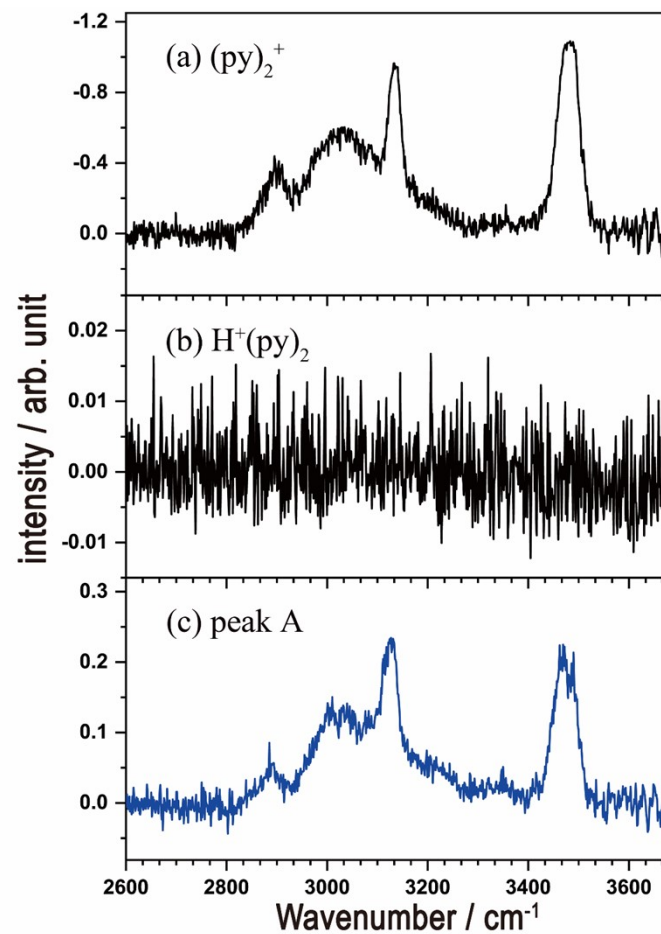

**Figure S7.** (Left panel) Expanded mass spectrum near the  $(py)^+$  region with the IR laser off (black trace) and on (red trace) at  $3480 \text{ cm}^{-1}$ . (Right panel) IR spectra of  $(py)_2^+$ ,  $H^+(py)_2$  and peak A labeled in the mass spectrum. The infrared light is introduced 300ns later than that of VUV light in the ionization region.

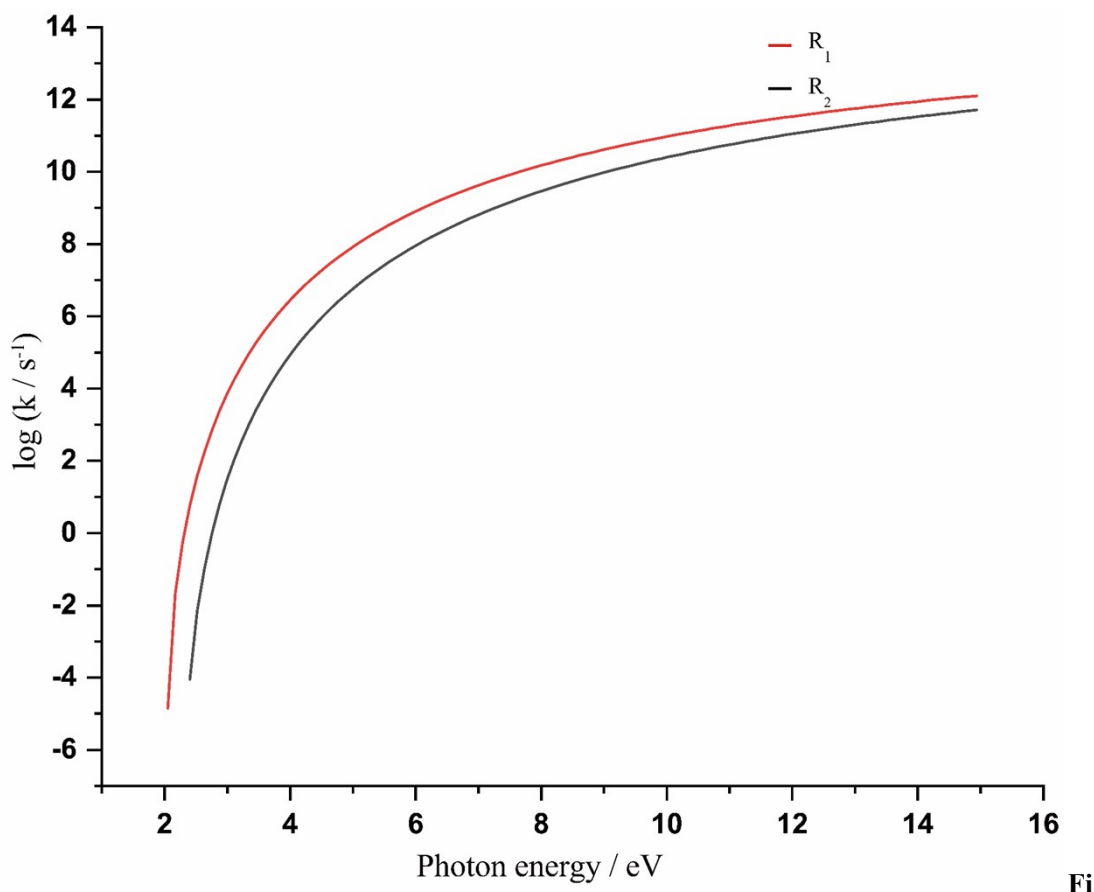

**Figure S8.** The calculated RRKM isomerization rate constants for the production of **cc1** ( $R_1$ ) and **cn1** ( $R_2$ ) after ionization as a function of the photon energy.

### Computational details of the kinetics stimulation

The internal energy-dependent isomerization rate constants  $R(E)$  of two paths to form covalent bonds were calculated using Rice–Ramsperger–Kassel–Marcus (RRKM) theory.<sup>52,53</sup> The isomerization rate constant with an internal energy  $E$  can be calculated as follows:

$$R(E) = \frac{\sigma N^*(E - E_0)}{h\rho(E)}$$

where  $\sigma$  is the reaction degeneracy,  $N^*(E - E_0)$  represents the total number of states for the activated complex,  $E$  depicts the energy deposited after vertical ionization and  $E_0$  is the energy difference between the transition states and  $AIE$  ( $E_0 = AE - AIE$ ),  $h$  is

Planck's constant and  $\rho(E)$  denotes the density of energized reactant molecule.  $N^*(E - E_0)$  and  $\rho(E)$  are calculated at the harmonic vibrational frequencies using the Beyer-Swinehart algorithm program. The pre-exponential factor is  $A$ , which can be preset in the Masskinetics program<sup>45</sup>, and  $\log A = 15$  is employed in this work. In the following isomerization, the rate constant can be calculated without considering the kinetic energy of the electrons by applying the maximum value of the internal energy of the parent ion ( $E = h\nu - AIE$ ).

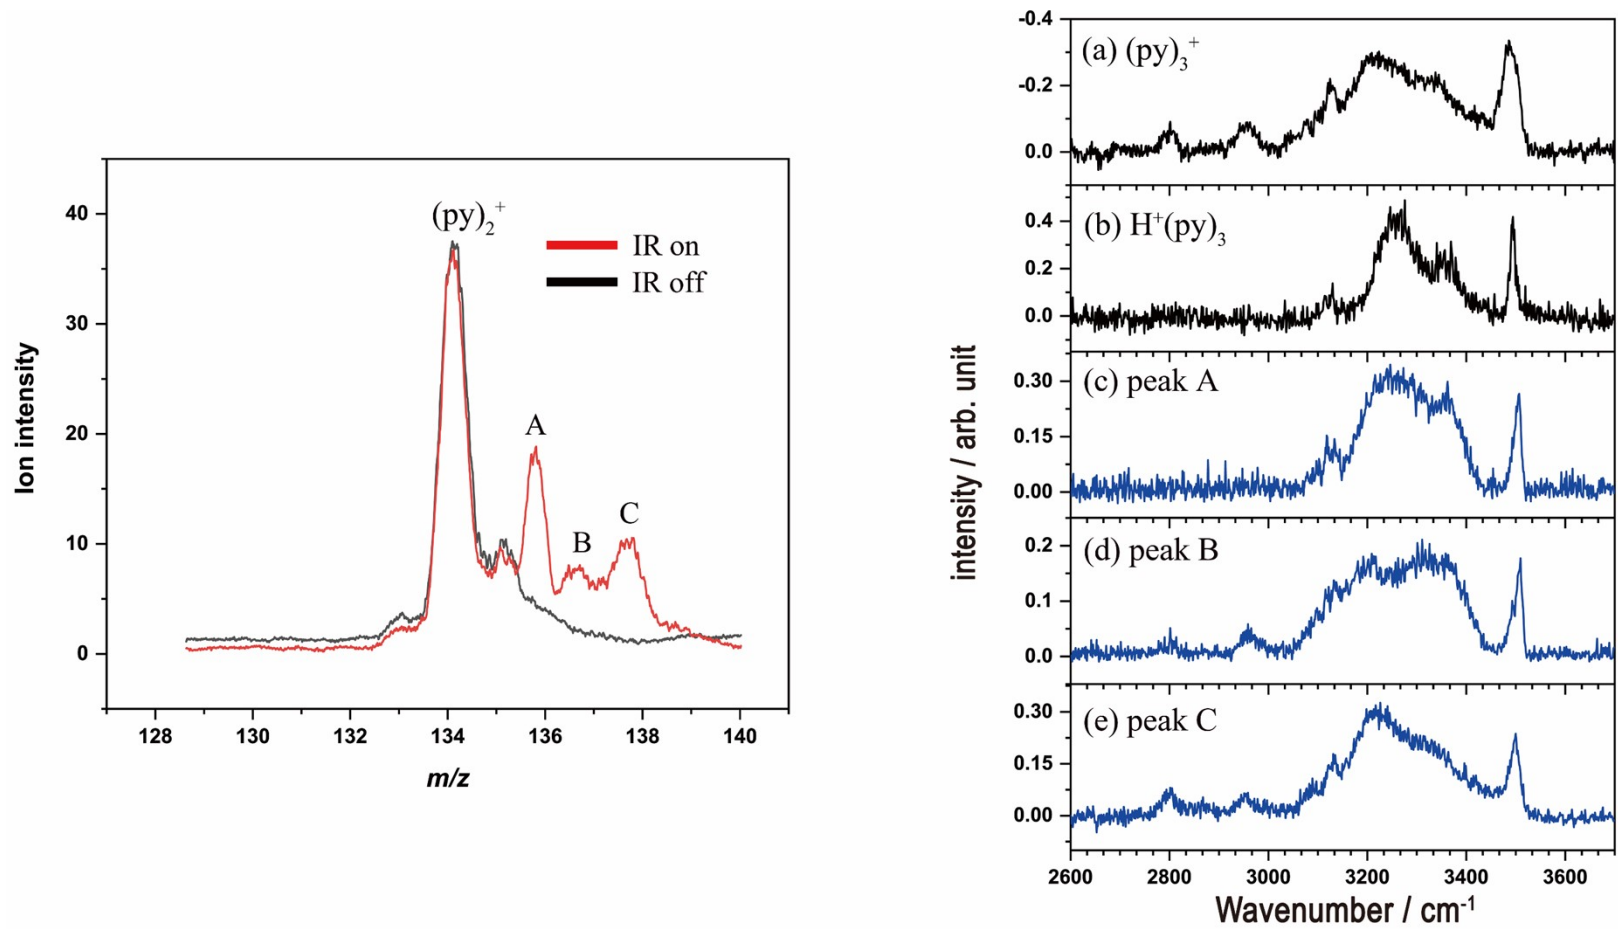

**Figure S9.** (Left panel) Expanded mass spectrum near the  $(py)_2^+$  region with the IR laser off (black trace) and on (red trace) at  $3480\text{ cm}^{-1}$ . (Right panel) IR spectra of  $(py)_3^+$ ,  $H^+(py)_3$  and peak A labeled in the mass spectrum. The infrared light is introduced 300ns later than that of VUV light in the ionization region.

**Table S1.** Comparison of observed and scaled harmonic frequencies of  $(py)_2^+$  and their assignments.

| Experiment                               |                           | Calculation <sup>[a]</sup> |              |              | Assignments                |
|------------------------------------------|---------------------------|----------------------------|--------------|--------------|----------------------------|
| Bands (cm <sup>-1</sup> ) <sup>[b]</sup> | <b>cc1</b>                | <b>cn1</b>                 | <b>pp1</b>   | <b>nπ1</b>   |                            |
| 2887                                     | 2881 (3.2) <sup>[c]</sup> | 2886 (5.6)                 |              | 2891(3.3)    | s-CH <sub>2</sub> -stretch |
|                                          |                           | 2873 (5.5)                 |              |              |                            |
| 3011                                     | 2911 (1.5)                | 2920 (0.4)                 |              |              | a-CH <sub>2</sub> -stretch |
|                                          |                           | 2904 (0.6)                 |              |              |                            |
| 3129                                     | 3077 (18.4)               | 3082 (1.5)                 | 3100 (15.7)  | 3071 (2.5)   | a-CH-stretch               |
|                                          |                           | 3080 (19.9)                | 3090 (0.8)   | 3090 (1.1)   |                            |
|                                          |                           |                            |              | 3093(1.1)    |                            |
|                                          |                           |                            |              | 3101 (9.2)   |                            |
| 3470                                     | 3095 (4.8)                | 3108 (6.9)                 | 3114 (0.5)   | 3121 (1.8)   | s-CH-stretch               |
|                                          |                           | 3106 (14.1)                | 3108 (18.7)  | 3109 (11.1)  |                            |
|                                          |                           | 3095 (4.9)                 |              |              |                            |
| 3470                                     | 3473 (607.4)              | 3479 (296.1)               | 3470 (297.5) | 3465 (144.7) | free NH-stretch            |

<sup>[a]</sup> calculated at B3LYP-D3(BJ)/6-311++G(d,p) level and scaled by a factor of 0.954. <sup>[b]</sup> wavenumbers of the bands in the IR spectra of  $(py)_2^+$ . <sup>[c]</sup> the value in the parentheses is IR intensities in km mol<sup>-1</sup>.

**Table S2.** Comparison of observed and scaled harmonic frequencies of (py)<sub>3</sub><sup>+</sup> and their assignments.

| Experiment                                  | Calculation <sup>[a]</sup>   |                           |                          |                          | Assignments                                      |
|---------------------------------------------|------------------------------|---------------------------|--------------------------|--------------------------|--------------------------------------------------|
|                                             | (cc1) <sup>+</sup> py        | (cn1) <sup>+</sup> py     | (pp1) <sup>+</sup> py    | (nπ1) <sup>+</sup> py    |                                                  |
| Bands<br>(cm <sup>-1</sup> ) <sup>[b]</sup> |                              |                           |                          |                          |                                                  |
| 2793                                        | 2881<br>(1.9) <sup>[c]</sup> | 2882 (7.0)<br>2880 (10.0) |                          | 2889 (2.5)               | s-CH <sub>2</sub> -stretch                       |
| 2943                                        | 2876 (4.0)                   | 2912 (2.0)                |                          |                          | a-CH <sub>2</sub> -stretch                       |
|                                             | 2905 (2.0)                   |                           |                          |                          |                                                  |
|                                             | 3079 (3.0)                   | 3095 (4.5)                | 3108 (7.0)               | 3099 (4.6)               | a-CH-stretch                                     |
|                                             | 3079 (1.0)                   | 3081 (2.1)                | 3106 (2.4)               | 3027 (4.2)               |                                                  |
|                                             | 3077 (11.1)                  | 3076 (9.3)                | 3101 (5.1)               | 3091 (0.8)               |                                                  |
|                                             |                              |                           | 3099 (2.2)               |                          |                                                  |
|                                             |                              |                           | 3093 (0.5)               |                          |                                                  |
| broad<br>feature                            | 3095<br>(1.4)                | 3107 (10.1)<br>3107 (5.3) | 3116 (3.6)<br>3115 (0.4) | 3129 (1.6)<br>3109 (8.2) | s-CH-stretch                                     |
|                                             | 3095 (1.3)                   |                           |                          |                          |                                                  |
|                                             | 3104 (0.7)                   | 3104 (0.9)                | 3098 (2.9)               | 3078 (1.1)               | H-bonded a-CH-                                   |
|                                             | 3089 (0.2)                   | 3089 (0.3)                | 3085 (1.2)               | 3104 (1.4)               | stretch of third C <sub>4</sub> H <sub>5</sub> N |
|                                             |                              | 3079 (0.8)                | 3073 (0.5)               |                          |                                                  |
|                                             | 3109 (0.1)                   | 3108 (0.1)                | 3104 (1.2)               | 3109 (0.4)               | H-bonded s-CH-                                   |
|                                             |                              |                           |                          |                          | stretch of third C <sub>4</sub> H <sub>5</sub> N |
| 3488                                        | 3484 (92.3)                  | 3482 (97.9)               | 3476                     | 3480 (106)               | free NH-stretch                                  |
|                                             | 3481<br>(288.9)              |                           | (102.1)                  |                          |                                                  |
|                                             |                              | 3231                      | 3309                     |                          | H-bonded NH-stretch                              |
|                                             | 3249<br>(1908.1)             | (1775.9)                  | (1249.7)                 | 3210                     |                                                  |
|                                             |                              |                           | 3281<br>(131.8)          | (1073.7)                 |                                                  |

<sup>[a]</sup> calculated at B3LYP-D3(BJ)/6-311++G(d,p) level and scaled by a factor of 0.954. <sup>[b]</sup> wavenumbers of the bands in the IR spectra of (py)<sub>2</sub><sup>+</sup>. <sup>[c]</sup> the value in the parentheses is IR intensities in km mol<sup>-1</sup>.

**Table S3.** The simulated spectra of the three isomers for  $(py)_2^+$  were calculated at B3LYP-D3(BJ)/6-311++G(d,p) level and their assignments.

| Isomers    | Fundamental<br>Freq.<br>( $cm^{-1}$ ) | Intensity<br>( $Km$<br>$mol^{-1}$ ) | Assignments | Overtone<br>Freq.<br>( $cm^{-1}$ ) | Intensity<br>( $Km$ $mol^{-1}$ ) | Assignments             |
|------------|---------------------------------------|-------------------------------------|-------------|------------------------------------|----------------------------------|-------------------------|
| <b>pp1</b> | 3117                                  | 1.3                                 | Fund (45)   | 2671                               | 0.0                              | Over (37 <sup>2</sup> ) |
|            | 3118                                  | 0.0                                 | Fund (46)   | 2703                               | 0.0                              | Over (38 <sup>2</sup> ) |
|            | 3126                                  | 0.6                                 | Fund (47)   | 2707                               | 0.0                              | Over (39 <sup>2</sup> ) |
|            | 3127                                  | 11.4                                | Fund (48)   | 2802                               | 0.0                              | Over (40 <sup>2</sup> ) |
|            | 3133                                  | 0.3                                 | Fund (49)   | 2950                               | 0.0                              | Over (41 <sup>2</sup> ) |
|            | 3134                                  | 11.7                                | Fund (50)   | 2965                               | 0.0                              | Over (42 <sup>2</sup> ) |
|            | 3140                                  | 0.0                                 | Fund (51)   | 2961                               | 0.0                              | Over (43 <sup>2</sup> ) |
|            | 3141                                  | 0.0                                 | Fund (52)   | 2982                               | 0.0                              | Over (44 <sup>2</sup> ) |
| <b>cc1</b> | 2901                                  | 0.0                                 | Fund (45)   | 2829                               | 0.0                              | Over (38 <sup>2</sup> ) |
|            | 2909                                  | 2.0                                 | Fund (46)   | 2849                               | 0.0                              | Over (39 <sup>2</sup> ) |
|            | 2904                                  | 2.2                                 | Fund (47)   | 2952                               | 0.0                              | Over (40 <sup>2</sup> ) |
|            | 2905                                  | 1.1                                 | Fund (48)   | 2963                               | 0.0                              | Over (41 <sup>2</sup> ) |
|            | 3107                                  | 11.1                                | Fund (49)   | 2978                               | 0.0                              | Over (42 <sup>2</sup> ) |
|            | 3109                                  | 1.4                                 | Fund (50)   | 3001                               | 0.0                              | Over (43 <sup>2</sup> ) |
|            | 3127                                  | 4.7                                 | Fund (51)   | 3141                               | 0.0                              | Over (44 <sup>2</sup> ) |
|            | 3128                                  | 0.3                                 | Fund (52)   |                                    |                                  |                         |
| <b>cn1</b> | 2891                                  | 2.3                                 | Fund (45)   | 2728                               | 0.1                              | Over (37 <sup>2</sup> ) |
|            | 2909                                  | 2.1                                 | Fund (46)   | 2793                               | 0.8                              | Over (38 <sup>2</sup> ) |
|            | 2898                                  | 1.5                                 | Fund (47)   | 2833                               | 0.0                              | Over (39 <sup>2</sup> ) |
|            | 2916                                  | 1.1                                 | Fund (48)   | 2848                               | 0.7                              | Over (40 <sup>2</sup> ) |
|            | 3109                                  | 4.4                                 | Fund (49)   | 2944                               | 0.6                              | Over (41 <sup>2</sup> ) |
|            | 3094                                  | 1.7                                 | Fund (50)   | 2970                               | 2.1                              | Over (42 <sup>2</sup> ) |
|            |                                       |                                     |             | 2992                               | 0.4                              | Over (43 <sup>2</sup> ) |
|            |                                       |                                     |             | 3084                               | 9.8                              | Over (44 <sup>2</sup> ) |
